# Supplementary material for: Porous Cr2O3 bead with a 3D continuous pore architecture: synthesis and its catalytic performance for decomposition of ammonium perchlorate
Source: Royal Society of Chemistry journal article supplement (doi:10.1039/c9nj01025d), 2019-01-01
Supplement: c9nj01025d1.pdf [file c9nj01025d1.pdf]

## Supporting Information

### **Porous Cr<sub>2</sub>O<sub>3</sub> bead with 3D continuous pore architecture: synthesis and its catalytic performances for decomposition of ammonium perchlorate**

Dakang Wang, Yanqiu Jiang\*, Yinghui Hu, Dongyu Hao, Yulin Yang\*, Ruiqing Fan,  
Debin Xia, Kaifeng Lin

MIIT Key Laboratory of Critical Materials Technology for New Energy Conversion  
and Storage, School of Chemistry and Chemical Engineering, Harbin Institute of  
Technology, Harbin 150001, PR China

\* Corresponding authors, e-mail: [ylyang@hit.edu.cn](mailto:ylyang@hit.edu.cn) and [jiangyanqiu@hit.edu.cn](mailto:jiangyanqiu@hit.edu.cn)

**Table S1**

The products of Cr<sub>2</sub>O<sub>3</sub> beads synthesized via various conditions.

| Entry | Symbol                                                                                 | C <sub>(K<sub>2</sub>Cr<sub>2</sub>O<sub>7</sub>)</sub> /mol•L <sup>-1</sup> | Calcination temperature/°C |
|-------|----------------------------------------------------------------------------------------|------------------------------------------------------------------------------|----------------------------|
| 1     | 0.05 M-Cr <sub>2</sub> O <sub>3</sub> -MPB                                             | 0.05                                                                         | 750                        |
| 2     | 0.1 M-Cr <sub>2</sub> O <sub>3</sub> -MPB                                              | 0.1                                                                          | 750                        |
| 3     | 0.2 M-Cr <sub>2</sub> O <sub>3</sub> -MPB (750 °C-Cr <sub>2</sub> O <sub>3</sub> -MPB) | 0.2                                                                          | 750                        |
| 4     | 0.4 M-Cr <sub>2</sub> O <sub>3</sub> -MPB                                              | 0.4                                                                          | 750                        |
| 5     | 450 °C-Cr <sub>2</sub> O <sub>3</sub> -MPB                                             | 0.2                                                                          | 450                        |
| 6     | 550 °C-Cr <sub>2</sub> O <sub>3</sub> -MPB                                             | 0.2                                                                          | 550                        |
| 7     | Commercial Cr <sub>2</sub> O <sub>3</sub>                                              | —                                                                            | —                          |

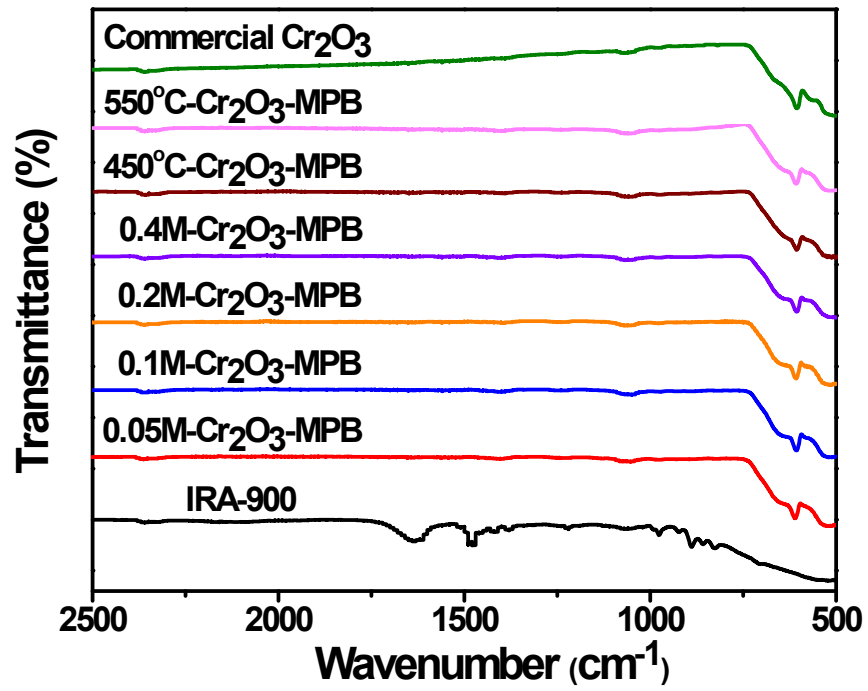

Fig. S1 FT-IR spectra of IRA-900 commercial Cr<sub>2</sub>O<sub>3</sub> and synthesized Cr<sub>2</sub>O<sub>3</sub>-MPB materials.

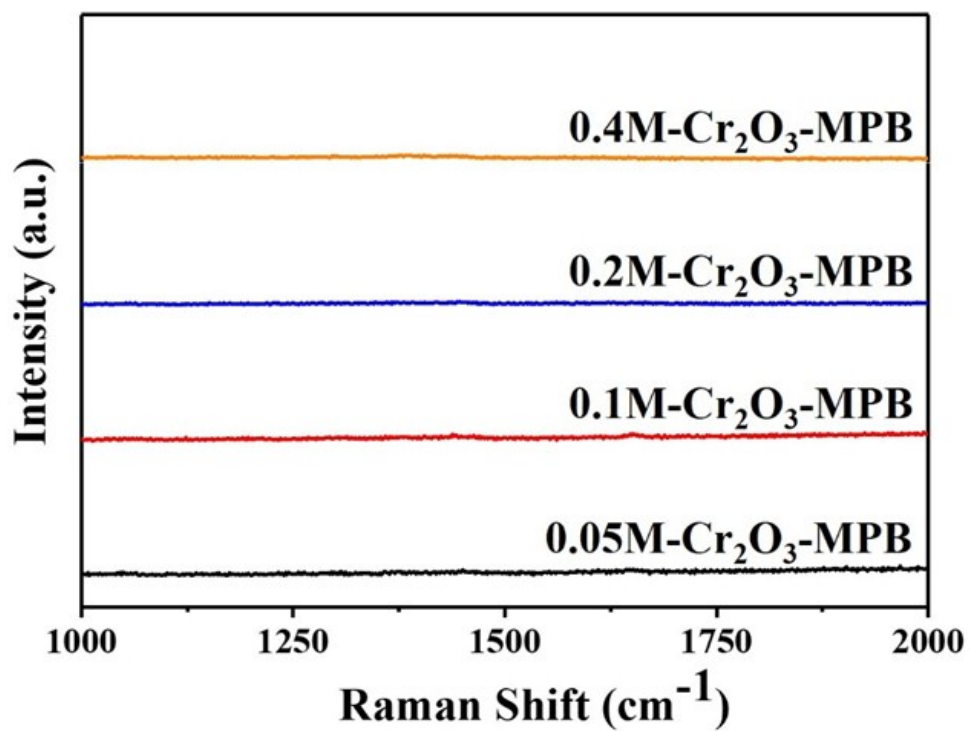

Fig. S2 Raman spectra of 0.05 M-Cr<sub>2</sub>O<sub>3</sub>-MPB, 0.1 M-Cr<sub>2</sub>O<sub>3</sub>-MPB, 0.2 M-Cr<sub>2</sub>O<sub>3</sub>-MPB and 0.4 M-Cr<sub>2</sub>O<sub>3</sub>-MPB. The spectra were measured at 532 nm laser wavelength.

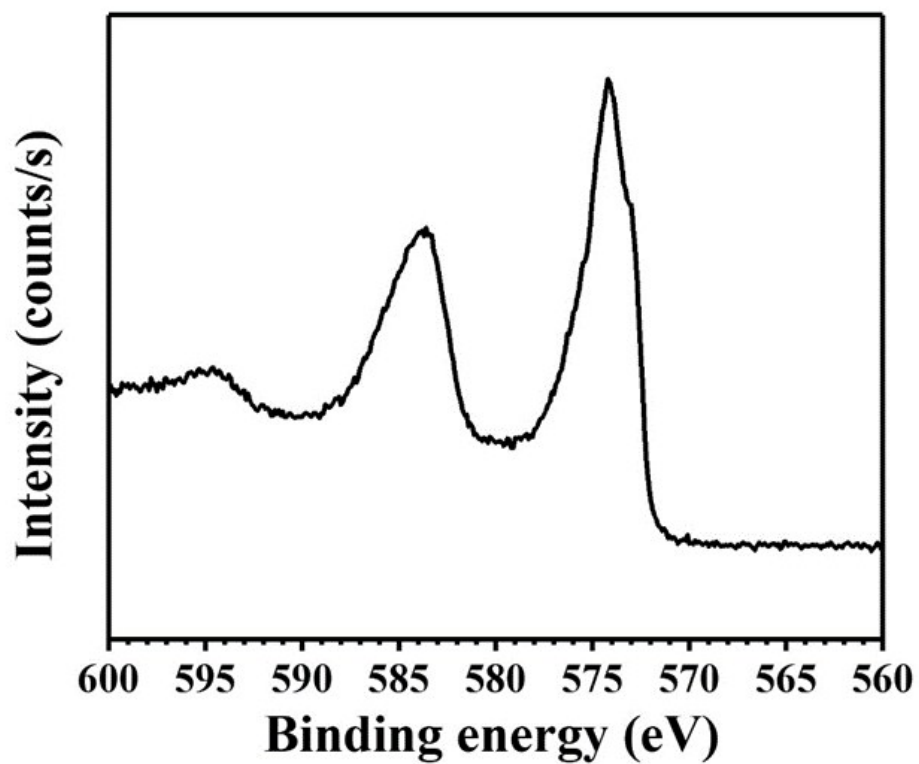

Fig. S3 XPS spectrum of 0.2 M-Cr<sub>2</sub>O<sub>3</sub>-MPB. The instrument (ESCALAB 250Xi, ThermoFisher) was used for the analysis.

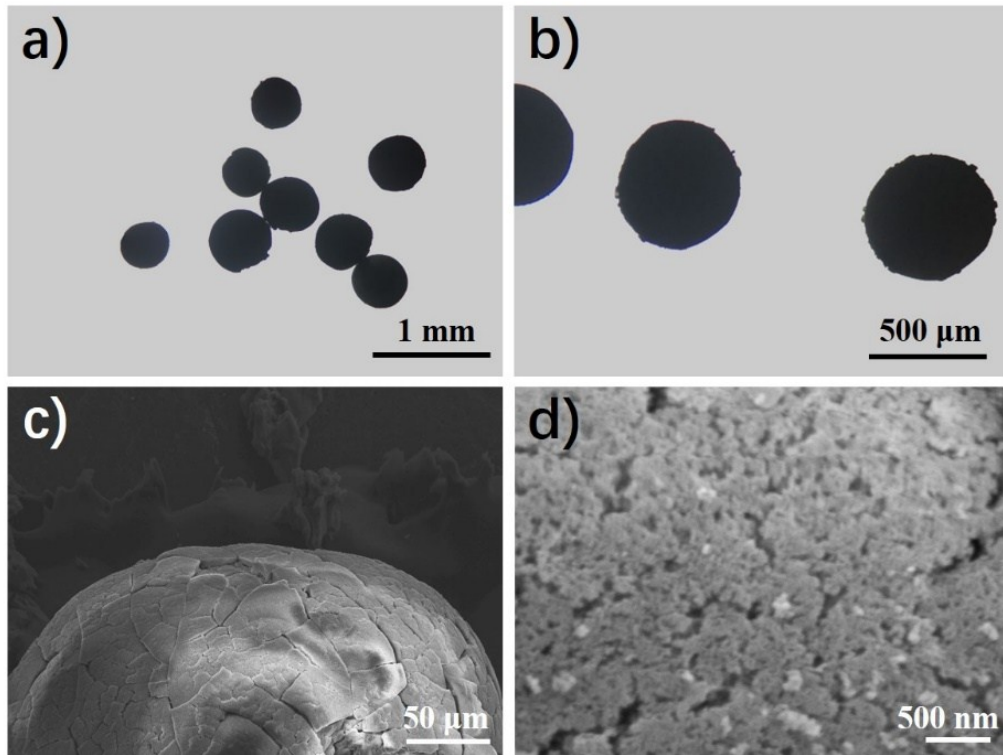

Fig. S4 a) and b) Microscopic images of 0.2 M-Cr<sub>2</sub>O<sub>3</sub>-MPB with different magnification; c) and d) SEM image of the surface of 0.2 M-Cr<sub>2</sub>O<sub>3</sub>-MPB.

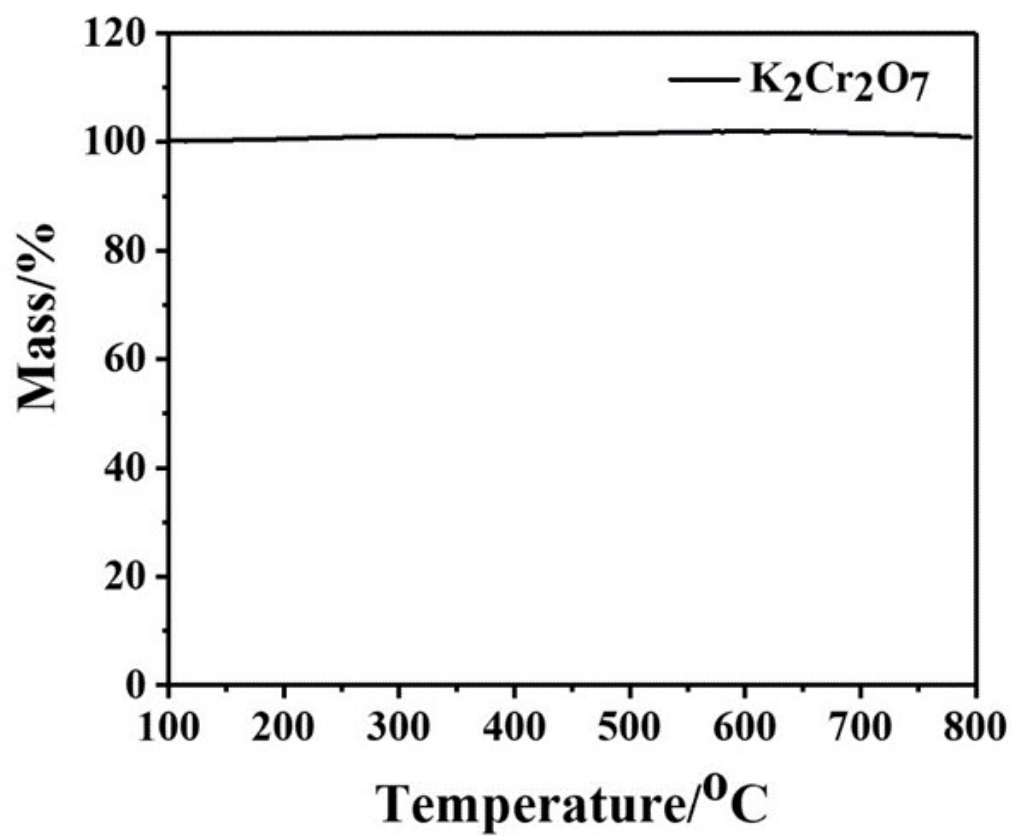

Fig. S5 TG curve of  $K_2Cr_2O_7$  powders in air atmosphere.

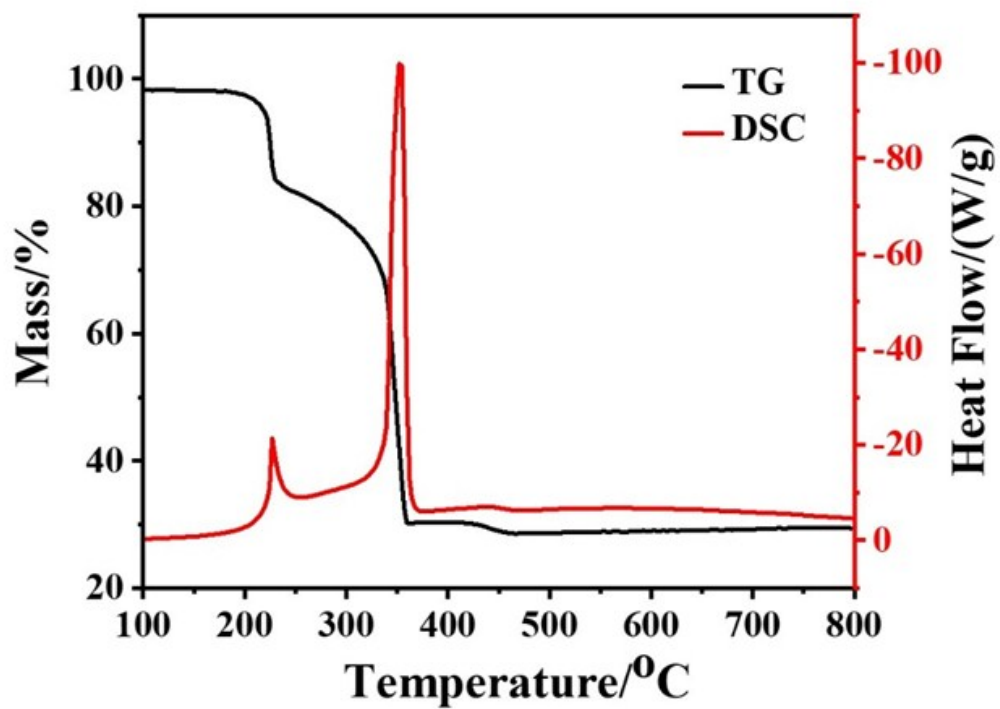

Fig. S6 TG-DSC curves of IRA-900 resin beads containing  $\text{Cr}_2\text{O}_7^{2-}$  anions in air atmosphere.



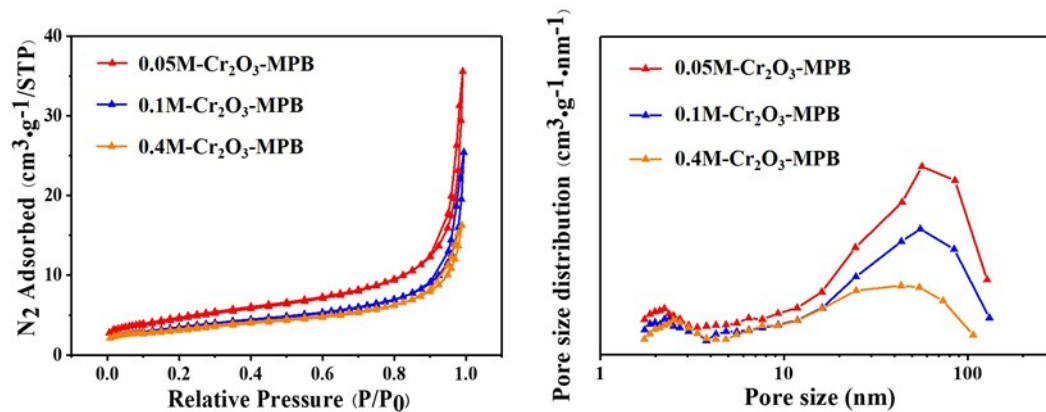

Fig. S7 Nitrogen adsorption-desorption isotherms and the homologous pore size distribution curves of series of  $\text{Cr}_2\text{O}_3$ -MPB materials.

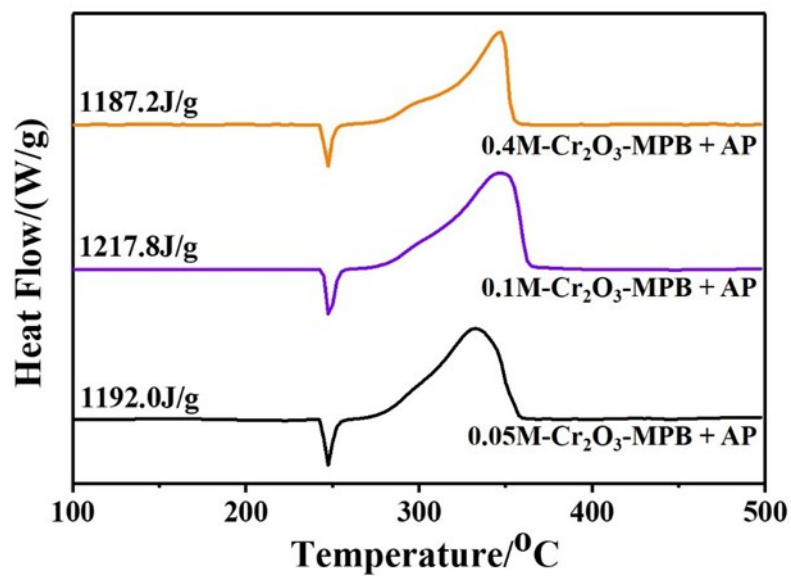

Fig. S8 DSC curves of mixtures of AP and series of Cr<sub>2</sub>O<sub>3</sub>-MPB materials.

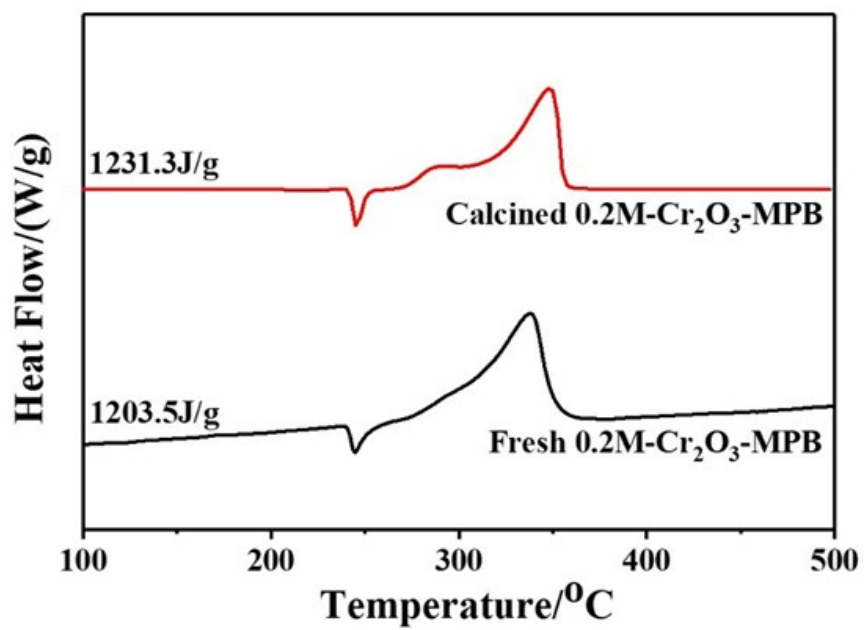

Fig. S9 DSC curves of mixtures of AP and fresh/calcined 0.2 M-Cr<sub>2</sub>O<sub>3</sub>-MPB.

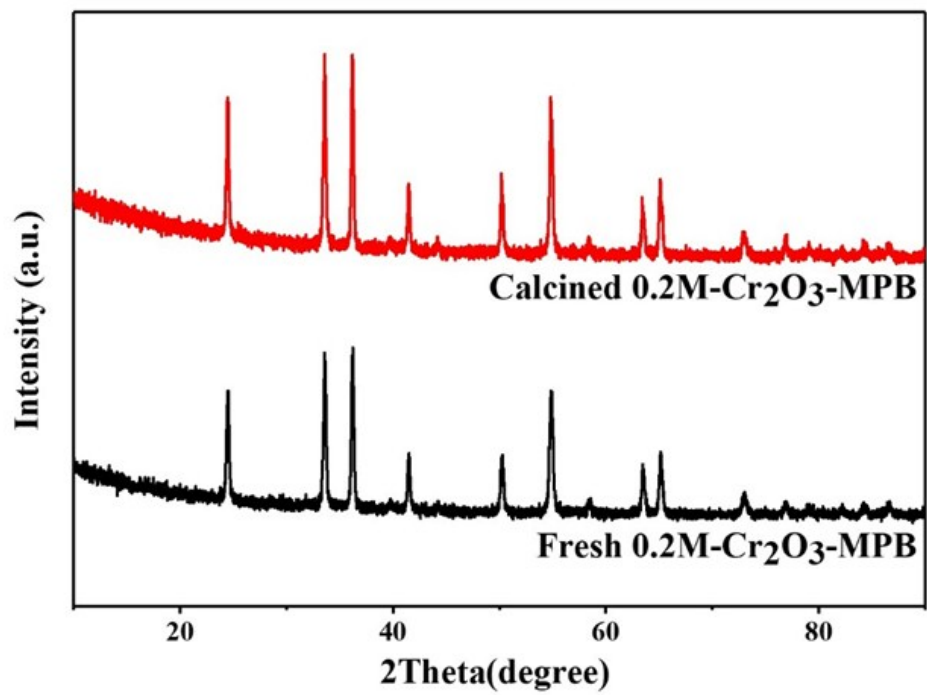

Fig. S10 XRD patterns of fresh and calcined 0.2 M-Cr<sub>2</sub>O<sub>3</sub>-MPB.

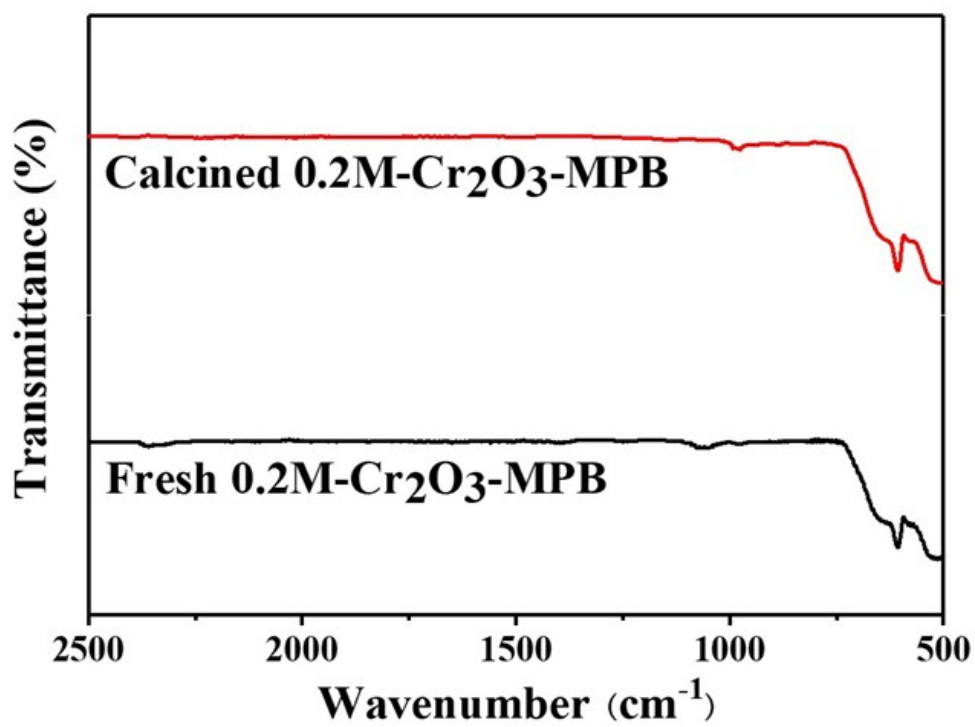

Fig. S11 FT-IR spectra of fresh and calcined 0.2 M-Cr<sub>2</sub>O<sub>3</sub>-MPB.
